# Supplementary material
Source: publisher site journal article supplement (https://www.e-cmh.org/upload/media/cmh-2023-0437-Supplementary-Table-1.pdf)
Supplement: Supplementary file 1 [file cmh-2023-0437-Supplementary-Table-1.pdf]

**Supplementary Table 1.** Baseline characteristics and outcomes of patients with NAFLD and MAFLD, respectively

| Variable                               | NAFLD (n=1,457)         |                 | MASLD (n=1,244)         |                 |
|----------------------------------------|-------------------------|-----------------|-------------------------|-----------------|
|                                        | Median (IQR)            | Range (min-max) | Median (IQR)            | Range (min-max) |
| Age (yr)                               | 50 (41–57)              | 21–80           | 50 (42–58)              | 21–80           |
| Sex (female/male)                      | 43.7%/56.4% (636/821)   | N/A             | 44.5%/55.5% (553/691)   | N/A             |
| Body mass index (kg/m <sup>2</sup> )   | 24.5 (22.4–26.9)        | 14.3–59.8       | 25.0 (23.2–27.3)        | 15.6–59.8       |
| Hiatal hernia (presence/absence)       | 18.4%/81.6% (268/1,189) | N/A             | 18.9%/81.1% (235/1,009) | N/A             |
| Eating habits (yes/no)                 | 21.1%/78.9% (307/1,150) | N/A             | 21.1%/78.9% (263/981)   | N/A             |
| Exercise habits (yes/no)               | 18.0%/82.0% (262/1,195) | N/A             | 18.4%/81.6% (229/1,015) | N/A             |
| Cardiometabolic criteria               |                         |                 |                         |                 |
| Overweight/obesity or central obesity* | 73.9%/26.1% (1077/380)  | N/A             | 86.6%/13.4% (1,077/167) | N/A             |
| Insulin resistance <sup>†</sup>        | 44.5%/55.5% (649/808)   | N/A             | 52.2%/47.8% (649/595)   | N/A             |
| Hypertension <sup>‡</sup>              | 27.2%/72.8% (396/1,061) | N/A             | 31.8%/68.2% (396/848)   | N/A             |
| High triglycerides <sup>§</sup>        | 33.6%/66.4% (489/968)   | N/A             | 39.3%/60.7% (489/755)   | N/A             |
| Dyslipidemia <sup>  </sup>             | 19.8%/80.2% (289/1,168) | N/A             | 23.2%/76.8% (289/955)   | N/A             |
| Reflux esophagitis development         | 17.8%/82.2% (259/1,198) | N/A             | 18.2%/81.8% (226/1,018) | N/A             |

Data are presented as medians with interquartile ranges, or as counts and percentages. Eating habits were defined as eating within 2 hours before bedtime at least three times/week. Exercise habits were defined as an exercise for at least 30 minutes/session.

MASLD, metabolic dysfunction-associated steatotic liver disease; NAFLD, non-alcoholic fatty liver disease; IQR, interquartile range; BMI, body mass index; WC, 000; HDL, 000; N/A, 000.

\*Defined as BMI ≥23 kg/m<sup>2</sup>, or WC >94 cm (M) 80 cm (F).

<sup>†</sup>Defined as a fasting glucose ≥5.6 mmol/L, or HbA1c ≥39 mmol/L, or known type 2 diabetes, or antidiabetic treatment.

<sup>‡</sup>Defined as ≥130/85 mmHg or antihypertensive treatment.

<sup>§</sup>Defined as plasma triglycerides ≥1.70 mmol/L, or lipid lowering treatment.

<sup>||</sup>Defined as HDL-cholesterol ≤1.0 mmol/L for men and ≤1.3 mmol/L for women, or lipid lowering treatment.
